# Supplementary material for: Developingin vitroassays to transform gastrointestinal safety assessment: potential for microphysiological systems
Source: Royal Society of Chemistry journal article supplement (doi:10.1039/c9lc01107b), 2020-01-01
Supplement: c9lc01107b1.pdf [file c9lc01107b1.pdf]

2/20/2020

### Supplemental Table 1. References for Nausea Qualification Set

| Drug Name    | Reference Nausea Incidence                                                                                                                                                                                                                                                                                                                                              | Reference Exposure                                                                                                                                                                                                                                                                                                                                                      |
|--------------|-------------------------------------------------------------------------------------------------------------------------------------------------------------------------------------------------------------------------------------------------------------------------------------------------------------------------------------------------------------------------|-------------------------------------------------------------------------------------------------------------------------------------------------------------------------------------------------------------------------------------------------------------------------------------------------------------------------------------------------------------------------|
| Carboplatin  | <i>Acta Oncologica</i> <b>29</b> , 593-595 (1990)                                                                                                                                                                                                                                                                                                                       | <i>J Clin Pharmacol</i> <b>28</b> , 208-215 (1988)                                                                                                                                                                                                                                                                                                                      |
| Oxycodone    | <i>Curr Med Res Opin</i> <b>25</b> , 765-776 (2009)                                                                                                                                                                                                                                                                                                                     | <i>Clin Ther</i> <b>18</b> , 95-105 (1996)                                                                                                                                                                                                                                                                                                                              |
| Pomalidomide | Pomalidomide. FDA Approval Package. Label 204026/S-000 (2013-02-08). Retrieved from <a href="https://www.pharmapendium.com/browse/fda/Pomalidomide/178f7bb33c2fb5d512a2c79a3c6c8c48?query=constipation&amp;includeSynonyms=true">https://www.pharmapendium.com/browse/fda/Pomalidomide/178f7bb33c2fb5d512a2c79a3c6c8c48?query=constipation&amp;includeSynonyms=true</a> | Pomalidomide. FDA Approval Package. Label 204026/S-000 (2013-02-08). Retrieved from <a href="https://www.pharmapendium.com/browse/fda/Pomalidomide/178f7bb33c2fb5d512a2c79a3c6c8c48?query=constipation&amp;includeSynonyms=true">https://www.pharmapendium.com/browse/fda/Pomalidomide/178f7bb33c2fb5d512a2c79a3c6c8c48?query=constipation&amp;includeSynonyms=true</a> |
| Cabozantinib | <i>Ann Oncol</i> <b>28</b> , 2813-2819 (2017)                                                                                                                                                                                                                                                                                                                           | <i>J Clin Pharmacol</i> <b>55</b> , 1293-1302 (2015)                                                                                                                                                                                                                                                                                                                    |
| Bortezomib   | Bortezomib. Mosby's Drug Consult. (2006). <a href="https://www.pharmapendium.com/browse/mosby/Bortezomib/Bortezomib">https://www.pharmapendium.com/browse/mosby/Bortezomib/Bortezomib</a>                                                                                                                                                                               | Bortezomib. Mosby's Drug Consult. (2006). <a href="https://www.pharmapendium.com/browse/mosby/Bortezomib/Bortezomib">https://www.pharmapendium.com/browse/mosby/Bortezomib/Bortezomib</a>                                                                                                                                                                               |
| Raltitrexed  | Pfizer. (2017). <i>Product Monograph Tomudex (Raltitrexed disodium for Injection)</i> . Retrieved from <a href="https://www.pfizer.ca/sites/g/files/g10050796/f/201710/TOMUDEX_PM.pdf">https://www.pfizer.ca/sites/g/files/g10050796/f/201710/TOMUDEX_PM.pdf</a>                                                                                                        | Pfizer. (2017). <i>Product Monograph Tomudex (Raltitrexed disodium for Injection)</i> . Retrieved from <a href="https://www.pfizer.ca/sites/g/files/g10050796/f/201710/TOMUDEX_PM.pdf">https://www.pfizer.ca/sites/g/files/g10050796/f/201710/TOMUDEX_PM.pdf</a>                                                                                                        |
| Tapentadol   | <i>Curr Med Res Opin</i> <b>25</b> , 765-776 (2009)                                                                                                                                                                                                                                                                                                                     | <i>Drugs</i> <b>70</b> , 1719-1743 (2010)                                                                                                                                                                                                                                                                                                                               |
| Bosutinib    | <i>Haematologica</i> <b>103</b> , 1298-1307 (2018)                                                                                                                                                                                                                                                                                                                      | Bosutinib Monohydrate. FDA Approval Package. Label 203341/S-015 (Revised 10/2018). Retrieved from <a href="https://www.pharmapendium.com/browse/fda/Bosutinib%20Monohydrate/f5513801f774cb2f3723257e3147c3e9">https://www.pharmapendium.com/browse/fda/Bosutinib%20Monohydrate/f5513801f774cb2f3723257e3147c3e9</a>                                                     |
| Ixabepilone  | Ixabepilone. FDA Approval Package. Label 022065/S-006 (2011-10-20). Retrieved from <a href="https://www.pharmapendium.com/browse/fda/Ixabepilone/133ec8399fcb53c2063d1aa6629ba2ec">https://www.pharmapendium.com/browse/fda/Ixabepilone/133ec8399fcb53c2063d1aa6629ba2ec</a>                                                                                            | Ixabepilone. FDA Approval Package. Label 022065/S-006 (2011-10-20). Retrieved from <a href="https://www.pharmapendium.com/browse/fda/Ixabepilone/133ec8399fcb53c2063d1aa6629ba2ec">https://www.pharmapendium.com/browse/fda/Ixabepilone/133ec8399fcb53c2063d1aa6629ba2ec</a>                                                                                            |

2/20/2020

|                   |                                                                                                                                                                                                                                                                      |                                                                                                                                                                                                                                                                                                                                                                  |
|-------------------|----------------------------------------------------------------------------------------------------------------------------------------------------------------------------------------------------------------------------------------------------------------------|------------------------------------------------------------------------------------------------------------------------------------------------------------------------------------------------------------------------------------------------------------------------------------------------------------------------------------------------------------------|
| Decitabine        | Decitabine. Mosby's Drug Consult. (2006).<br><a href="https://www.pharmapendium.com/browse/mosby/Decitabine/Decitabine">https://www.pharmapendium.com/browse/mosby/Decitabine/Decitabine</a>                                                                         | Eisai. (2010). <i>DACOGEN® (decitabine) for INJECTION: Highlights of Prescribing Information</i> . Retrieved from <a href="https://www.accessdata.fda.gov/drugsatfda_docs/label/2010/021790s006lbl.pdf">https://www.accessdata.fda.gov/drugsatfda_docs/label/2010/021790s006lbl.pdf</a>                                                                          |
| Pemetrexed        | Pemetrexed Disodium. Mosby's Drug Consult. (2006).<br><a href="https://www.pharmapendium.com/browse/mosby/Pemetrexed%20Disodium/Pemetrexed">https://www.pharmapendium.com/browse/mosby/Pemetrexed%20Disodium/Pemetrexed</a>                                          | Pemetrexed Disodium. FDA Approval Package. Clinical Pharmacology and Biopharmaceutics Review 021462/S-000 Part 01 (2002-10-24). Retrieved from:<br><a href="https://www.pharmapendium.com/browse/fda/Pemetrexed%20Disodium/6eb6e273a10c29b7aa117782946caadf">https://www.pharmapendium.com/browse/fda/Pemetrexed%20Disodium/6eb6e273a10c29b7aa117782946caadf</a> |
| Lubiprostone      | Lubiprostone. Mosby's Drug Consult. (2006).<br><a href="https://www.pharmapendium.com/browse/mosby/Lubiprostone/Lubiprostone">https://www.pharmapendium.com/browse/mosby/Lubiprostone/Lubiprostone</a>                                                               | Lubiprostone. Mosby's Drug Consult. (2006).<br><a href="https://www.pharmapendium.com/browse/mosby/Lubiprostone/Lubiprostone">https://www.pharmapendium.com/browse/mosby/Lubiprostone/Lubiprostone</a>                                                                                                                                                           |
| Varenicline       | Varenicline Tartrate. Mosby's Drug Consult. (2006).<br><a href="https://www.pharmapendium.com/#/browse/mosby/Varenicline%20Tartrate/Varenicline">https://www.pharmapendium.com/#/browse/mosby/Varenicline%20Tartrate/Varenicline</a>                                 | <i>J Clin Pharmacol</i> <b>46</b> , 1439-1448 (2006)                                                                                                                                                                                                                                                                                                             |
| Ritonavir         | Ritonavir. Mosby's Drug Consult. (2006).<br><a href="https://www.pharmapendium.com/#/browse/mosby/Ritonavir/Ritonavir">https://www.pharmapendium.com/#/browse/mosby/Ritonavir/Ritonavir</a>                                                                          | Ritonavir. Mosby's Drug Consult. (2006).<br><a href="https://www.pharmapendium.com/#/browse/mosby/Ritonavir/Ritonavir">https://www.pharmapendium.com/#/browse/mosby/Ritonavir/Ritonavir</a>                                                                                                                                                                      |
| Mycophenolic acid | Mycophenolic Acid. Mosby's Drug Consult. (2006).<br><a href="https://www.pharmapendium.com/#/browse/mosby/Mycophenolic%20Acid/Mycophenolic%20Acid">https://www.pharmapendium.com/#/browse/mosby/Mycophenolic%20Acid/Mycophenolic%20Acid</a>                          | Mycophenolic Acid. Mosby's Drug Consult. (2006).<br><a href="https://www.pharmapendium.com/#/browse/mosby/Mycophenolic%20Acid/Mycophenolic%20Acid">https://www.pharmapendium.com/#/browse/mosby/Mycophenolic%20Acid/Mycophenolic%20Acid</a>                                                                                                                      |
| Docetaxel         | See Pemetrexed Disodium. Mosby's Drug Consult. (2006).<br><a href="https://www.pharmapendium.com/browse/mosby/Pemetrexed%20Disodium/Pemetrexed">https://www.pharmapendium.com/browse/mosby/Pemetrexed%20Disodium/Pemetrexed</a>                                      | <i>Clin Cancer Res</i> <b>10</b> , 1976-1983 (2004)                                                                                                                                                                                                                                                                                                              |
| Tramadol (ER)     | Tramadol Hydrochloride. Mosby's Drug Consult. (2006).<br><a href="https://www.pharmapendium.com/#/browse/mosby/Tramadol%20Hydrochloride/Tramadol%20Hydrochloride">https://www.pharmapendium.com/#/browse/mosby/Tramadol%20Hydrochloride/Tramadol%20Hydrochloride</a> | Tramadol Hydrochloride. Mosby's Drug Consult. (2006).<br><a href="https://www.pharmapendium.com/#/browse/mosby/Tramadol%20Hydrochloride/Tramadol%20Hydrochloride">https://www.pharmapendium.com/#/browse/mosby/Tramadol%20Hydrochloride/Tramadol%20Hydrochloride</a>                                                                                             |
| Duloxetine        | Duloxetine Hydrochloride. Mosby's Drug Consult. (2006).<br><a href="https://www.pharmapendium.com/#/browse/mosby/Duloxetine%20Hydrochloride">https://www.pharmapendium.com/#/browse/mosby/Duloxetine%20Hydrochloride</a>                                             | <i>Clin Pharmacokinet</i> <b>50</b> , 281-294 (2011)                                                                                                                                                                                                                                                                                                             |

hloride/Duloxetine%20Hydrochloride

|              |                                                                                                                                                                                                                                                                                                                    |                                                                                                                                                                                                                                                                                                                    |
|--------------|--------------------------------------------------------------------------------------------------------------------------------------------------------------------------------------------------------------------------------------------------------------------------------------------------------------------|--------------------------------------------------------------------------------------------------------------------------------------------------------------------------------------------------------------------------------------------------------------------------------------------------------------------|
| Pentostatin  | Pentostatin. Mosby's Drug Consult. (2006).<br><a href="https://www.pharmapendium.com/#/browse/mosby/Pentostatin/Pentostatin">https://www.pharmapendium.com/#/browse/mosby/Pentostatin/Pentostatin</a>                                                                                                              | Pentostatin. FDA Approval Package 020122/S-001 Part 06 (1991-10-11). Retrieved from <a href="https://www.pharmapendium.com/browse/fda/Pentostatin/a3ec8fb5c6bfbde4ca1d0b11732de5ef">https://www.pharmapendium.com/browse/fda/Pentostatin/a3ec8fb5c6bfbde4ca1d0b11732de5ef</a>                                      |
| Dofetilide   | Dofetilide. Mosby's Drug Consult. (2006).<br><a href="https://www.pharmapendium.com/#/browse/mosby/Dofetilide/Dofetilide">https://www.pharmapendium.com/#/browse/mosby/Dofetilide/Dofetilide</a>                                                                                                                   | <i>Br J Clin Pharmacol</i> <b>50</b> , 247-253 (2000)                                                                                                                                                                                                                                                              |
| Febuxostat   | Febuxostat. FDA Approval Package. Label 021856/S-013 (2019-02-22). Retrieved from <a href="https://www.pharmapendium.com/browse/fda/Febuxostat/3dbd0fb13eb3428c822846570b4d0861">https://www.pharmapendium.com/browse/fda/Febuxostat/3dbd0fb13eb3428c822846570b4d0861</a>                                          | Febuxostat. FDA Approval Package. Pharmacology Review 021856/S-000 Part 01 (2009-01-05). Retrieved from <a href="https://www.pharmapendium.com/browse/fda/Febuxostat/f82153647be473742615b8a6a2f24fcc">https://www.pharmapendium.com/browse/fda/Febuxostat/f82153647be473742615b8a6a2f24fcc</a>                    |
| Amlodipine   | Amlodipine Besylate. Mosby's Drug Consult. (2006).<br><a href="https://www.pharmapendium.com/#/browse/mosby/Amlodipine%20Besylate/Amlodipine%20Besylate">https://www.pharmapendium.com/#/browse/mosby/Amlodipine%20Besylate/Amlodipine%20Besylate</a>                                                              | <i>Clin Pharmacokinet</i> <b>22</b> , 22-31 (1992)                                                                                                                                                                                                                                                                 |
| Verapamil    | Verapamil Hydrochloride. Mosby's Drug Consult. (2006).<br><a href="https://www.pharmapendium.com/#/browse/mosby/Verapamil%20Hydrochloride/Verapamil%20Hydrochloride">https://www.pharmapendium.com/#/browse/mosby/Verapamil%20Hydrochloride/Verapamil%20Hydrochloride</a>                                          | <i>Br J Clin Pharmacol</i> <b>33</b> , 623-627 (1992)                                                                                                                                                                                                                                                              |
| Maprotiline  | Maprotiline Hydrochloride. Mosby's Drug Consult. (2006).<br><a href="https://www.pharmapendium.com/#/browse/mosby/Maprotiline%20Hydrochloride/Maprotiline%20Hydrochloride">https://www.pharmapendium.com/#/browse/mosby/Maprotiline%20Hydrochloride/Maprotiline%20Hydrochloride</a>                                | <i>Br J Clin Pharmacol</i> <b>37</b> , 383-388 (1994)                                                                                                                                                                                                                                                              |
| Fesoterodine | Fesoterodine Fumarate. FDA Approval Package. Label 022030/S-009 (2012-08-02). Retrieved from <a href="https://www.pharmapendium.com/#/browse/fda/Fesoterodine%20Fumarate/427218bb4ab95e96610527dfd099ad00">https://www.pharmapendium.com/#/browse/fda/Fesoterodine%20Fumarate/427218bb4ab95e96610527dfd099ad00</a> | Fesoterodine Fumarate. FDA Approval Package. Label 022030/S-009 (2012-08-02). Retrieved from <a href="https://www.pharmapendium.com/#/browse/fda/Fesoterodine%20Fumarate/427218bb4ab95e96610527dfd099ad00">https://www.pharmapendium.com/#/browse/fda/Fesoterodine%20Fumarate/427218bb4ab95e96610527dfd099ad00</a> |
| Furosemide   | <i>Am. J. Med.</i> <b>111</b> , 513-520 (2001)                                                                                                                                                                                                                                                                     | <i>Clin Pharmacol Ther</i> <b>14</b> , 178-186 (1974)                                                                                                                                                                                                                                                              |

2/20/2020

|             |                                                                                                                                                                                                                                                                                                                                                                                                |                                                                                                                                                                                                                                                   |
|-------------|------------------------------------------------------------------------------------------------------------------------------------------------------------------------------------------------------------------------------------------------------------------------------------------------------------------------------------------------------------------------------------------------|---------------------------------------------------------------------------------------------------------------------------------------------------------------------------------------------------------------------------------------------------|
| Nadolol     | Nadolol. Mosby's Drug Consult. (2006).<br><a href="https://www.pharmapendium.com/#/browse/mosby/Nadolol/Nadolol">https://www.pharmapendium.com/#/browse/mosby/Nadolol/Nadolol</a>                                                                                                                                                                                                              | <i>Eur J Clin Pharmacol</i> <b>26</b> , 125-127 (1984)                                                                                                                                                                                            |
| Simvastatin | Simvastatin. Mosby's Drug Consult. (2006).<br><a href="https://www.pharmapendium.com/#/browse/mosby/Simvastatin/Simvastatin">https://www.pharmapendium.com/#/browse/mosby/Simvastatin/Simvastatin</a>                                                                                                                                                                                          | <i>Clin Pharmacokinet</i> <b>31</b> , 348-371 (1996)                                                                                                                                                                                              |
| Finasteride | Finasteride. FDA Approval Package. Medical/Clinical Review 020788/S-000 Part 03 (1997-12-19). Retrieved from<br><a href="https://www.pharmapendium.com/#/browse/fda/Finasteride/fa76d8e4fb4829402ed41ad44706e0d5?query=nausea&amp;includeSynonyms=true">https://www.pharmapendium.com/#/browse/fda/Finasteride/fa76d8e4fb4829402ed41ad44706e0d5?query=nausea&amp;includeSynonyms=true</a>      | Finasteride. Mosby's Drug Consult. (2006).<br><a href="https://www.pharmapendium.com/#/browse/mosby/Finasteride/Finasteride#Brand%20Name:Propecia">https://www.pharmapendium.com/#/browse/mosby/Finasteride/Finasteride#Brand%20Name:Propecia</a> |
| Haloperidol | Haloperidol. FDA Approval Package 017079 (1972-01-03). Retrieved from<br><a href="https://www.pharmapendium.com/#/browse/fda/Haloperidol/734c22981d4d1510f1ca6144b87fd01e?query=nausea&amp;includeSynonyms=true">https://www.pharmapendium.com/#/browse/fda/Haloperidol/734c22981d4d1510f1ca6144b87fd01e?query=nausea&amp;includeSynonyms=true</a>                                             | <i>Clin Pharmacokinet</i> <b>34</b> , 227-263 (1998)                                                                                                                                                                                              |
| Valsartan   | Lancet 370, 221-229 (2007)                                                                                                                                                                                                                                                                                                                                                                     | <i>Eur J Clin Pharmacol</i> <b>52</b> , 371-378 (1997)                                                                                                                                                                                            |
| Prednisone  | Prednisone. FDA Approval Package. Medical/Clinical Review 202020/S-000 Part 04 (2011-09-27). Retrieved from<br><a href="https://www.pharmapendium.com/browse/fda/Prednisone/296a610bbfd14db2eb9c8bc2970d46b0?query=constipation&amp;includeSynonyms=true">https://www.pharmapendium.com/browse/fda/Prednisone/296a610bbfd14db2eb9c8bc2970d46b0?query=constipation&amp;includeSynonyms=true</a> | <i>J Clin Pharmacol</i> <b>53</b> , 326-333 (2013)                                                                                                                                                                                                |
| Oxazepam    | Oxazepam. Mosby's Drug Consult. (2006).<br><a href="https://www.pharmapendium.com/#/browse/mosby/Oxazepam/Oxazepam">https://www.pharmapendium.com/#/browse/mosby/Oxazepam/Oxazepam</a>                                                                                                                                                                                                         | Oxazepam. Mosby's Drug Consult. (2006).<br><a href="https://www.pharmapendium.com/#/browse/mosby/Oxazepam/Oxazepam">https://www.pharmapendium.com/#/browse/mosby/Oxazepam/Oxazepam</a>                                                            |

## Supplemental Table 2. References for Vomiting Qualification Set

| Drug Name   | Reference Vomiting Incidence                                                                                                                                                                                                                                                 | Reference Exposure                                                                                                                                                                                                                                                                                                  |
|-------------|------------------------------------------------------------------------------------------------------------------------------------------------------------------------------------------------------------------------------------------------------------------------------|---------------------------------------------------------------------------------------------------------------------------------------------------------------------------------------------------------------------------------------------------------------------------------------------------------------------|
| Carboplatin | <i>Acta Oncologica</i> <b>29</b> , 593-595 (1990)                                                                                                                                                                                                                            | <i>J Clin Pharmacol</i> <b>28</b> , 208-215 (1988)                                                                                                                                                                                                                                                                  |
| Oxycodone   | <i>Curr Med Res Opin</i> <b>25</b> , 765-776 (2009)                                                                                                                                                                                                                          | <i>Clin Ther</i> <b>18</b> , 95-105 (1996)                                                                                                                                                                                                                                                                          |
| Raltitrexed | Pfizer. (2017). <i>Product Monograph Tomudex (Raltitrexed disodium for Injection)</i> . Retrieved from <a href="https://www.pfizer.ca/sites/g/files/g10050796/f/201710/TOMUDEX_PM.pdf">https://www.pfizer.ca/sites/g/files/g10050796/f/201710/TOMUDEX_PM.pdf</a>             | Pfizer. (2017). <i>Product Monograph Tomudex (Raltitrexed disodium for Injection)</i> . Retrieved from <a href="https://www.pfizer.ca/sites/g/files/g10050796/f/201710/TOMUDEX_PM.pdf">https://www.pfizer.ca/sites/g/files/g10050796/f/201710/TOMUDEX_PM.pdf</a>                                                    |
| Bosutinib   | <i>Haematologica</i> <b>103</b> , 1298-1307 (2018)                                                                                                                                                                                                                           | Bosutinib Monohydrate. FDA Approval Package. Label 203341/S-015 (Revised 10/2018). Retrieved from <a href="https://www.pharmapendium.com/browse/fda/Bosutinib%20Monohydrate/f5513801f774cb2f3723257e3147c3e9">https://www.pharmapendium.com/browse/fda/Bosutinib%20Monohydrate/f5513801f774cb2f3723257e3147c3e9</a> |
| Bortezomib  | Bortezomib. Mosby's Drug Consult. (2006). <a href="https://www.pharmapendium.com/browse/mosby/Bortezomib/Bortezomib">https://www.pharmapendium.com/browse/mosby/Bortezomib/Bortezomib</a>                                                                                    | Bortezomib. Mosby's Drug Consult. (2006). <a href="https://www.pharmapendium.com/browse/mosby/Bortezomib/Bortezomib">https://www.pharmapendium.com/browse/mosby/Bortezomib/Bortezomib</a>                                                                                                                           |
| Tapentadol  | <i>Curr Med Res Opin</i> <b>25</b> , 765-776 (2009)                                                                                                                                                                                                                          | <i>Drugs</i> <b>70</b> , 1719-1743 (2010)                                                                                                                                                                                                                                                                           |
| Ixabepilone | Ixabepilone. FDA Approval Package. Label 022065/S-006 (2011-10-20). Retrieved from <a href="https://www.pharmapendium.com/browse/fda/Ixabepilone/133ec8399fcb53c2063d1aa6629ba2ec">https://www.pharmapendium.com/browse/fda/Ixabepilone/133ec8399fcb53c2063d1aa6629ba2ec</a> | Ixabepilone. FDA Approval Package. Label 022065/S-006 (2011-10-20). Retrieved from <a href="https://www.pharmapendium.com/browse/fda/Ixabepilone/133ec8399fcb53c2063d1aa6629ba2ec">https://www.pharmapendium.com/browse/fda/Ixabepilone/133ec8399fcb53c2063d1aa6629ba2ec</a>                                        |
| Cinacalcet  | Cinacalcet Hydrochloride. Mosby's Drug Consult. (2006). <a href="https://www.pharmapendium.com/#/browse/mosby/Cinacalcet%20Hydrochloride/Cinacalcet%20Hydrochloride">https://www.pharmapendium.com/#/browse/mosby/Cinacalcet%20Hydrochloride/Cinacalcet%20Hydrochloride</a>  | <i>Clin Drug Investig</i> <b>34</b> , 537-544 (2014)                                                                                                                                                                                                                                                                |

2/20/2020

|                   |                                                                                                                                                                                                                                                                                |                                                                                                                                                                                                                                                                                                                                                               |
|-------------------|--------------------------------------------------------------------------------------------------------------------------------------------------------------------------------------------------------------------------------------------------------------------------------|---------------------------------------------------------------------------------------------------------------------------------------------------------------------------------------------------------------------------------------------------------------------------------------------------------------------------------------------------------------|
| Cabozantinib      | <i>Ann Oncol</i> <b>28</b> , 2813-2819 (2017)                                                                                                                                                                                                                                  | <i>J Clin Pharmacol</i> <b>55</b> , 1293-1302 (2015)                                                                                                                                                                                                                                                                                                          |
| Decitabine        | Decitabine. Mosby's Drug Consult. (2006).<br><a href="https://www.pharmapendium.com/browse/mosby/Decitabine/Decitabine">https://www.pharmapendium.com/browse/mosby/Decitabine/Decitabine</a>                                                                                   | Eisai. (2010). <i>DACOGEN® (decitabine) for INJECTION: Highlights of Prescribing Information</i> . Retrieved from <a href="https://www.accessdata.fda.gov/drugsatfda_docs/label/2010/021790s006lbl.pdf">https://www.accessdata.fda.gov/drugsatfda_docs/label/2010/021790s006lbl.pdf</a>                                                                       |
| Pemetrexed        | Pemetrexed Disodium. Mosby's Drug Consult. (2006).<br><a href="https://www.pharmapendium.com/browse/mosby/Pemetrexed%20Disodium/Pemetrexed">https://www.pharmapendium.com/browse/mosby/Pemetrexed%20Disodium/Pemetrexed</a>                                                    | Pemetrexed Disodium. FDA Approval Package. Clinical Pharmacology and Biopharmaceutics Review 021462/S-000 Part 01 (2002-10-24). Retrieved from: <a href="https://www.pharmapendium.com/browse/fda/Pemetrexed%20Disodium/6eb6e273a10c29b7aa117782946caadf">https://www.pharmapendium.com/browse/fda/Pemetrexed%20Disodium/6eb6e273a10c29b7aa117782946caadf</a> |
| Mycophenolic acid | Mycophenolic Acid. Mosby's Drug Consult. (2006).<br><a href="https://www.pharmapendium.com/#/browse/mosby/Mycophenolic%20Acid/Mycophenolic%20Acid">https://www.pharmapendium.com/#/browse/mosby/Mycophenolic%20Acid/Mycophenolic%20Acid</a>                                    | Mycophenolic Acid. Mosby's Drug Consult. (2006).<br><a href="https://www.pharmapendium.com/#/browse/mosby/Mycophenolic%20Acid/Mycophenolic%20Acid">https://www.pharmapendium.com/#/browse/mosby/Mycophenolic%20Acid/Mycophenolic%20Acid</a>                                                                                                                   |
| Docetaxel         | See Pemetrexed Disodium. Mosby's Drug Consult. (2006).<br><a href="https://www.pharmapendium.com/browse/mosby/Pemetrexed%20Disodium/Pemetrexed">https://www.pharmapendium.com/browse/mosby/Pemetrexed%20Disodium/Pemetrexed</a>                                                | <i>Clin Cancer Res</i> <b>10</b> , 1976-1983 (2004)                                                                                                                                                                                                                                                                                                           |
| Ritonavir         | Ritonavir. Mosby's Drug Consult. (2006).<br><a href="https://www.pharmapendium.com/#/browse/mosby/Ritonavir/Ritonavir">https://www.pharmapendium.com/#/browse/mosby/Ritonavir/Ritonavir</a>                                                                                    | Ritonavir. Mosby's Drug Consult. (2006).<br><a href="https://www.pharmapendium.com/#/browse/mosby/Ritonavir/Ritonavir">https://www.pharmapendium.com/#/browse/mosby/Ritonavir/Ritonavir</a>                                                                                                                                                                   |
| Varenicline       | Varenicline Tartrate. Mosby's Drug Consult. (2006).<br><a href="https://www.pharmapendium.com/#/browse/mosby/Varenicline%20Tartrate/Varenicline">https://www.pharmapendium.com/#/browse/mosby/Varenicline%20Tartrate/Varenicline</a>                                           | <i>J Clin Pharmacol</i> <b>46</b> , 1439-1448 (2006)                                                                                                                                                                                                                                                                                                          |
| Duloxetine        | Duloxetine Hydrochloride. Mosby's Drug Consult. (2006).<br><a href="https://www.pharmapendium.com/#/browse/mosby/Duloxetine%20Hydrochloride/Duloxetine%20Hydrochloride">https://www.pharmapendium.com/#/browse/mosby/Duloxetine%20Hydrochloride/Duloxetine%20Hydrochloride</a> | <i>Clin Pharmacokinet</i> <b>50</b> , 281-294 (2011)                                                                                                                                                                                                                                                                                                          |
| Lubiprostone      | Lubiprostone. Mosby's Drug Consult. (2006).<br><a href="https://www.pharmapendium.com/#/browse/mosby/Lubiprostone/Lubiprostone">https://www.pharmapendium.com/#/browse/mosby/Lubiprostone/Lubiprostone</a>                                                                     | Lubiprostone. Mosby's Drug Consult. (2006).<br><a href="https://www.pharmapendium.com/#/browse/mosby/Lubiprostone/Lubiprostone">https://www.pharmapendium.com/#/browse/mosby/Lubiprostone/Lubiprostone</a>                                                                                                                                                    |

prostone

|             |                                                                                                                                                                                                                                                                                                                                                                                                |                                                        |
|-------------|------------------------------------------------------------------------------------------------------------------------------------------------------------------------------------------------------------------------------------------------------------------------------------------------------------------------------------------------------------------------------------------------|--------------------------------------------------------|
| Amlodipine  | Amlodipine Besylate. Mosby's Drug Consult. (2006).<br><a href="https://www.pharmapendium.com/#/browse/mosby/Amlodipine%20Besylate/Amlodipine%20Besylate">https://www.pharmapendium.com/#/browse/mosby/Amlodipine%20Besylate/Amlodipine%20Besylate</a>                                                                                                                                          | <i>Clin Pharmacokinet</i> <b>22</b> , 22-31 (1992)     |
| Furosemide  | <i>Am. J. Med.</i> <b>111</b> , 513-520 (2001)                                                                                                                                                                                                                                                                                                                                                 | <i>Clin Pharmacol Ther</i> <b>14</b> , 178-186 (1974)  |
| Nadolol     | Nadolol. Mosby's Drug Consult. (2006).<br><a href="https://www.pharmapendium.com/#/browse/mosby/Nadolol/Nadolol">https://www.pharmapendium.com/#/browse/mosby/Nadolol/Nadolol</a>                                                                                                                                                                                                              | <i>Eur J Clin Pharmacol</i> <b>26</b> , 125-127 (1984) |
| Simvastatin | Simvastatin. Mosby's Drug Consult. (2006).<br><a href="https://www.pharmapendium.com/#/browse/mosby/Simvastatin/Simvastatin">https://www.pharmapendium.com/#/browse/mosby/Simvastatin/Simvastatin</a>                                                                                                                                                                                          | <i>Clin Pharmacokinet</i> <b>31</b> , 348-371 (1996)   |
| Prednisone  | Prednisone. FDA Approval Package. Medical/Clinical Review 202020/S-000 Part 04 (2011-09-27). Retrieved from<br><a href="https://www.pharmapendium.com/browse/fda/Prednisone/296a610bbfd14db2eb9c8bc2970d46b0?query=constipation&amp;includeSynonyms=true">https://www.pharmapendium.com/browse/fda/Prednisone/296a610bbfd14db2eb9c8bc2970d46b0?query=constipation&amp;includeSynonyms=true</a> | <i>J Clin Pharmacol</i> <b>53</b> , 326-333 (2013)     |
| Verapamil   | Verapamil Hydrochloride. Mosby's Drug Consult. (2006).<br><a href="https://www.pharmapendium.com/#/browse/mosby/Verapamil%20Hydrochloride/Verapamil%20Hydrochloride">https://www.pharmapendium.com/#/browse/mosby/Verapamil%20Hydrochloride/Verapamil%20Hydrochloride</a>                                                                                                                      | <i>Br J Clin Pharmacol</i> <b>33</b> , 623-627 (1992)  |
| Valsartan   | Valsartan. Mosby's Drug Consult (2006).<br><a href="https://www.pharmapendium.com/browse/mosby/Valsartan/Valsartan">https://www.pharmapendium.com/browse/mosby/Valsartan/Valsartan</a>                                                                                                                                                                                                         | <i>Eur J Clin Pharmacol</i> <b>52</b> , 371-378 (1997) |
| Maprotiline | Maprotiline Hydrochloride. Mosby's Drug Consult. (2006).<br><a href="https://www.pharmapendium.com/#/browse/mosby/Maprotiline%20Hydrochloride/Maprotiline%20Hydrochloride">https://www.pharmapendium.com/#/browse/mosby/Maprotiline%20Hydrochloride/Maprotiline%20Hydrochloride</a>                                                                                                            | <i>Br J Clin Pharmacol</i> <b>37</b> , 383-388 (1994)  |

2/20/2020

|              |                                                                                                                                                                                                                                                                                                                                                                                                                          |                                                                                                                                                                                                                                                                                                                    |
|--------------|--------------------------------------------------------------------------------------------------------------------------------------------------------------------------------------------------------------------------------------------------------------------------------------------------------------------------------------------------------------------------------------------------------------------------|--------------------------------------------------------------------------------------------------------------------------------------------------------------------------------------------------------------------------------------------------------------------------------------------------------------------|
| Haloperidol  | Haloperidol. FDA Approval Package 017079 (1972-01-03). Retrieved from <a href="https://www.pharmapendium.com/#/browse/fda/Haloperidol/734c22981d4d1510f1ca6144b87fd01e?query=nausea&amp;includeSynonyms=true">https://www.pharmapendium.com/#/browse/fda/Haloperidol/734c22981d4d1510f1ca6144b87fd01e?query=nausea&amp;includeSynonyms=true</a>                                                                          | <i>Clin Pharmacokinet</i> <b>34</b> , 227-263 (1998)                                                                                                                                                                                                                                                               |
| Guaifenesin  | Guaifenesin. Mosby's Drug Consult. (2006). <a href="https://www.pharmapendium.com/browse/mosby/Guaifenesin/Guaifenesin">https://www.pharmapendium.com/browse/mosby/Guaifenesin/Guaifenesin</a>                                                                                                                                                                                                                           | <i>Clin Pharmacol Drug Dev</i> <b>2</b> , 25-32 (2013)                                                                                                                                                                                                                                                             |
| Oxazepam     | Oxazepam. Mosby's Drug Consult. (2006). <a href="https://www.pharmapendium.com/#/browse/mosby/Oxazepam/Oxazepam">https://www.pharmapendium.com/#/browse/mosby/Oxazepam/Oxazepam</a>                                                                                                                                                                                                                                      | Oxazepam. Mosby's Drug Consult. (2006). <a href="https://www.pharmapendium.com/#/browse/mosby/Oxazepam/Oxazepam">https://www.pharmapendium.com/#/browse/mosby/Oxazepam/Oxazepam</a>                                                                                                                                |
| Dofetilide   | Dofetilide. Mosby's Drug Consult. (2006). <a href="https://www.pharmapendium.com/#/browse/mosby/Dofetilide/Dofetilide">https://www.pharmapendium.com/#/browse/mosby/Dofetilide/Dofetilide</a>                                                                                                                                                                                                                            | <i>Br J Clin Pharmacol</i> <b>50</b> , 247-253 (2000)                                                                                                                                                                                                                                                              |
| Fesoterodine | Fesoterodine Fumarate. FDA Approval Package. Medical/Clinical Review 022030/S-000 Part 02 (2007-01-25). Retrieved from <a href="https://www.pharmapendium.com/browse/fda/Fesoterodine%20Fumarate/bcb6ed914742fb95590f3c31c1e8622d?query=vomiting&amp;includeSynonyms=true">https://www.pharmapendium.com/browse/fda/Fesoterodine%20Fumarate/bcb6ed914742fb95590f3c31c1e8622d?query=vomiting&amp;includeSynonyms=true</a> | Fesoterodine Fumarate. FDA Approval Package. Label 022030/S-009 (2012-08-02). Retrieved from <a href="https://www.pharmapendium.com/#/browse/fda/Fesoterodine%20Fumarate/427218bb4ab95e96610527dfd099ad00">https://www.pharmapendium.com/#/browse/fda/Fesoterodine%20Fumarate/427218bb4ab95e96610527dfd099ad00</a> |
| Febuxostat   | Febuxostat. FDA Approval Package. Label 021856/S-013 (2019-02-22). Retrieved from <a href="https://www.pharmapendium.com/browse/fda/Febuxostat/3dbd0fb13eb3428c822846570b4d0861">https://www.pharmapendium.com/browse/fda/Febuxostat/3dbd0fb13eb3428c822846570b4d0861</a>                                                                                                                                                | Febuxostat. FDA Approval Package. Pharmacology Review 021856/S-000 Part 01 (2009-01-05). Retrieved from <a href="https://www.pharmapendium.com/browse/fda/Febuxostat/f82153647be473742615b8a6a2f24fcc">https://www.pharmapendium.com/browse/fda/Febuxostat/f82153647be473742615b8a6a2f24fcc</a>                    |



**Supplemental Table 3. References for Constipation Qualification Set**

| <b>Drug Name</b> | <b>Reference Incidence</b>                                                                                                                                                                                                                                                                                                                                              | <b>Reference Exposure</b>                                                                                                                                                                                                                                                                                                                                               |
|------------------|-------------------------------------------------------------------------------------------------------------------------------------------------------------------------------------------------------------------------------------------------------------------------------------------------------------------------------------------------------------------------|-------------------------------------------------------------------------------------------------------------------------------------------------------------------------------------------------------------------------------------------------------------------------------------------------------------------------------------------------------------------------|
| Clomipramine     | Clomipramine Hydrochloride. Mosby's Drug Consult. (2006). <a href="https://www.pharmapendium.com/#/browse/mosby/Clomipramine%20Hydrochloride/Clomipramine%20Hydrochloride">https://www.pharmapendium.com/#/browse/mosby/Clomipramine%20Hydrochloride/Clomipramine%20Hydrochloride</a>                                                                                   | Clomipramine Hydrochloride. Mosby's Drug Consult. (2006). <a href="https://www.pharmapendium.com/#/browse/mosby/Clomipramine%20Hydrochloride/Clomipramine%20Hydrochloride">https://www.pharmapendium.com/#/browse/mosby/Clomipramine%20Hydrochloride/Clomipramine%20Hydrochloride</a>                                                                                   |
| Bortezomib       | Bortezomib. Mosby's Drug Consult. (2006). <a href="https://www.pharmapendium.com/browse/mosby/Bortezomib/Bortezomib">https://www.pharmapendium.com/browse/mosby/Bortezomib/Bortezomib</a>                                                                                                                                                                               | Bortezomib. Mosby's Drug Consult. (2006). <a href="https://www.pharmapendium.com/browse/mosby/Bortezomib/Bortezomib">https://www.pharmapendium.com/browse/mosby/Bortezomib/Bortezomib</a>                                                                                                                                                                               |
| Pomalidomide     | Pomalidomide. FDA Approval Package. Label 204026/S-000 (2013-02-08). Retrieved from <a href="https://www.pharmapendium.com/browse/fda/Pomalidomide/178f7bb33c2fb5d512a2c79a3c6c8c48?query=constipation&amp;includeSynonyms=true">https://www.pharmapendium.com/browse/fda/Pomalidomide/178f7bb33c2fb5d512a2c79a3c6c8c48?query=constipation&amp;includeSynonyms=true</a> | Pomalidomide. FDA Approval Package. Label 204026/S-000 (2013-02-08). Retrieved from <a href="https://www.pharmapendium.com/browse/fda/Pomalidomide/178f7bb33c2fb5d512a2c79a3c6c8c48?query=constipation&amp;includeSynonyms=true">https://www.pharmapendium.com/browse/fda/Pomalidomide/178f7bb33c2fb5d512a2c79a3c6c8c48?query=constipation&amp;includeSynonyms=true</a> |
| Decitabine       | Decitabine. Mosby's Drug Consult. (2006). <a href="https://www.pharmapendium.com/browse/mosby/Decitabine/Decitabine">https://www.pharmapendium.com/browse/mosby/Decitabine/Decitabine</a>                                                                                                                                                                               | Eisai. (2010). <i>DACOGEN® (decitabine) for INJECTION: Highlights of Prescribing Information</i> . Retrieved from <a href="https://www.accessdata.fda.gov/drugsatfda_docs/label/2010/021790s006lbl.pdf">https://www.accessdata.fda.gov/drugsatfda_docs/label/2010/021790s006lbl.pdf</a>                                                                                 |
| Alosetron        | Alosetron Hydrochloride. Mosby's Drug Consult. (2006). <a href="https://www.pharmapendium.com/#/browse/mosby/Alosetron%20Hydrochloride/Alosetron%20Hydrochloride">https://www.pharmapendium.com/#/browse/mosby/Alosetron%20Hydrochloride/Alosetron%20Hydrochloride</a>                                                                                                  | <i>Women's Health</i> <b>3</b> , 15-27 (2007)                                                                                                                                                                                                                                                                                                                           |
| Cabozantinib     | <i>Ann Oncol</i> <b>28</b> , 2813-2819 (2017)                                                                                                                                                                                                                                                                                                                           | <i>J Clin Pharmacol</i> <b>55</b> , 1293-1302 (2015)                                                                                                                                                                                                                                                                                                                    |
| Clozapine        | Clozapine. Mosby's Drug Consult. (2006). <a href="https://www.pharmapendium.com/#/browse/mosby/Clozapine/Clozapine">https://www.pharmapendium.com/#/browse/mosby/Clozapine/Clozapine</a>                                                                                                                                                                                | Clozapine. Mosby's Drug Consult. (2006). <a href="https://www.pharmapendium.com/#/browse/mosby/Clozapine/Clozapine">https://www.pharmapendium.com/#/browse/mosby/Clozapine/Clozapine</a>                                                                                                                                                                                |

2/20/2020

|               |                                                                                                                                                                                                                                                                             |                                                                                                                                                                                                                                                                                            |
|---------------|-----------------------------------------------------------------------------------------------------------------------------------------------------------------------------------------------------------------------------------------------------------------------------|--------------------------------------------------------------------------------------------------------------------------------------------------------------------------------------------------------------------------------------------------------------------------------------------|
| Hydromorphone | <i>BMC Palliat Care</i> <b>7</b> , 17, doi: 10.1186/1472-684X-7-17 (2008)                                                                                                                                                                                                   | Hydromorphone Hydrochloride. Mosby's Drug Consult. (2006). <a href="https://www.pharmapendium.com/#/browse/mosby/Hydromorphone%20Hydrochloride/Hydromorphone%20Hydrochloride">https://www.pharmapendium.com/#/browse/mosby/Hydromorphone%20Hydrochloride/Hydromorphone%20Hydrochloride</a> |
| Tramadol (ER) | Tramadol Hydrochloride. Mosby's Drug Consult. (2006). <a href="https://www.pharmapendium.com/#/browse/mosby/Tramadol%20Hydrochloride/Tramadol%20Hydrochloride">https://www.pharmapendium.com/#/browse/mosby/Tramadol%20Hydrochloride/Tramadol%20Hydrochloride</a>           | Tramadol Hydrochloride. Mosby's Drug Consult. (2006). <a href="https://www.pharmapendium.com/#/browse/mosby/Tramadol%20Hydrochloride/Tramadol%20Hydrochloride">https://www.pharmapendium.com/#/browse/mosby/Tramadol%20Hydrochloride/Tramadol%20Hydrochloride</a>                          |
| Oxycodone     | <i>Curr Med Res Opin</i> <b>25</b> , 765-776 (2009)                                                                                                                                                                                                                         | <i>Clin Ther</i> <b>18</b> , 95-105 (1996)                                                                                                                                                                                                                                                 |
| Odansetron    | <i>Ann Oncol</i> <b>7</b> , 945-952 (1996)                                                                                                                                                                                                                                  | <i>Pharmacotherapy</i> <b>18</b> , 288-294 (1998)                                                                                                                                                                                                                                          |
| Duloxetine    | Duloxetine Hydrochloride. Mosby's Drug Consult. (2006). <a href="https://www.pharmapendium.com/#/browse/mosby/Duloxetine%20Hydrochloride/Duloxetine%20Hydrochloride">https://www.pharmapendium.com/#/browse/mosby/Duloxetine%20Hydrochloride/Duloxetine%20Hydrochloride</a> | <i>Clin Pharmacokinet</i> <b>50</b> , 281-294 (2011)                                                                                                                                                                                                                                       |
| Morphine      | <i>BMC Palliat Care</i> <b>7</b> , 17, doi: 10.1186/1472-684X-7-17 (2008)                                                                                                                                                                                                   | Morphine Sulfate. Mosby's Drug Consult. (2006). <a href="https://www.pharmapendium.com/#/browse/mosby/Morphine%20Sulfate/Morphine%20Sulfate">https://www.pharmapendium.com/#/browse/mosby/Morphine%20Sulfate/Morphine%20Sulfate</a>                                                        |
| Cabergoline   | Cabergoline. Mosby's Drug Consult. (2006). <a href="https://www.pharmapendium.com/#/browse/mosby/Cabergoline/Cabergoline">https://www.pharmapendium.com/#/browse/mosby/Cabergoline/Cabergoline</a>                                                                          | Cabergoline. Mosby's Drug Consult. (2006). <a href="https://www.pharmapendium.com/#/browse/mosby/Cabergoline/Cabergoline">https://www.pharmapendium.com/#/browse/mosby/Cabergoline/Cabergoline</a>                                                                                         |
| Voriconazole  | Voriconazole. Mosby's Drug Consult. (2006). <a href="https://www.pharmapendium.com/#/browse/mosby/Voriconazole/Voriconazole">https://www.pharmapendium.com/#/browse/mosby/Voriconazole/Voriconazole</a>                                                                     | Voriconazole. Mosby's Drug Consult. (2006). <a href="https://www.pharmapendium.com/#/browse/mosby/Voriconazole/Voriconazole">https://www.pharmapendium.com/#/browse/mosby/Voriconazole/Voriconazole</a>                                                                                    |
| Amlodipine    | Amlodipine Besylate. Mosby's Drug Consult. (2006). <a href="https://www.pharmapendium.com/#/browse/mosby/Amlodipine%20Besylate/Amlodipine%20Besylate">https://www.pharmapendium.com/#/browse/mosby/Amlodipine%20Besylate/Amlodipine%20Besylate</a>                          | <i>Clin Pharmacokinet</i> <b>22</b> , 22-31 (1992)                                                                                                                                                                                                                                         |
| Nadolol       | Nadolol. Mosby's Drug Consult. (2006). <a href="https://www.pharmapendium.com/#/browse/mosby/Nadolol/Nadolol">https://www.pharmapendium.com/#/browse/mosby/Nadolol/Nadolol</a>                                                                                              | <i>Eur J Clin Pharmacol</i> <b>26</b> , 125-127 (1984)                                                                                                                                                                                                                                     |

2/20/2020

|              |                                                                                                                                                                                                                                                                                                                                                                                             |                                                                                                                                                                                                                                                                                                                       |
|--------------|---------------------------------------------------------------------------------------------------------------------------------------------------------------------------------------------------------------------------------------------------------------------------------------------------------------------------------------------------------------------------------------------|-----------------------------------------------------------------------------------------------------------------------------------------------------------------------------------------------------------------------------------------------------------------------------------------------------------------------|
| Lubiprostone | Lubiprostone. Mosby's Drug Consult. (2006). <a href="https://www.pharmapendium.com/browse/mosby/Lubiprostone/Lubiprostone">https://www.pharmapendium.com/browse/mosby/Lubiprostone/Lubiprostone</a>                                                                                                                                                                                         | Lubiprostone. Mosby's Drug Consult. (2006). <a href="https://www.pharmapendium.com/browse/mosby/Lubiprostone/Lubiprostone">https://www.pharmapendium.com/browse/mosby/Lubiprostone/Lubiprostone</a>                                                                                                                   |
| Simvastatin  | Simvastatin. Mosby's Drug Consult. (2006). <a href="https://www.pharmapendium.com/#/browse/mosby/Simvastatin/Simvastatin">https://www.pharmapendium.com/#/browse/mosby/Simvastatin/Simvastatin</a>                                                                                                                                                                                          | <i>Clin Pharmacokinet</i> <b>31</b> , 348-371 (1996)                                                                                                                                                                                                                                                                  |
| Zolmitriptan | Zolmitriptan. Mosby's Drug Consult. (2006). <a href="https://www.pharmapendium.com/#/browse/mosby/Zolmitriptan/Zolmitriptan">https://www.pharmapendium.com/#/browse/mosby/Zolmitriptan/Zolmitriptan</a>                                                                                                                                                                                     | Zolmitriptan. FDA Approval Package. Clinical Pharmacology and Biopharmaceutics Review 020768 (1997-09-10). Retrieved from <a href="https://www.pharmapendium.com/browse/fda/Zolmitriptan/08677a5ed621a2b5955031c355a7420a">https://www.pharmapendium.com/browse/fda/Zolmitriptan/08677a5ed621a2b5955031c355a7420a</a> |
| Dofetilide   | Dofetilide. Mosby's Drug Consult. (2006). <a href="https://www.pharmapendium.com/#/browse/mosby/Dofetilide/Dofetilide">https://www.pharmapendium.com/#/browse/mosby/Dofetilide/Dofetilide</a>                                                                                                                                                                                               | <i>Br J Clin Pharmacol</i> <b>50</b> , 247-253 (2000)                                                                                                                                                                                                                                                                 |
| Prednisone   | Prednisone. FDA Approval Package. Medical/Clinical Review 202020/S-000 Part 04 (2011-09-27). Retrieved from <a href="https://www.pharmapendium.com/browse/fda/Prednisone/296a610bbfd14db2eb9c8bc2970d46b0?query=constipation&amp;includeSynonyms=true">https://www.pharmapendium.com/browse/fda/Prednisone/296a610bbfd14db2eb9c8bc2970d46b0?query=constipation&amp;includeSynonyms=true</a> | <i>J Clin Pharmacol</i> <b>53</b> , 326-333 (2013)                                                                                                                                                                                                                                                                    |
| Fomepizole   | Fomepizole. Mosby's Drug Consult. (2006). <a href="https://www.pharmapendium.com/browse/mosby/Fomepizole/Fomepizole">https://www.pharmapendium.com/browse/mosby/Fomepizole/Fomepizole</a>                                                                                                                                                                                                   | Fomepizole. Mosby's Drug Consult. (2006). <a href="https://www.pharmapendium.com/browse/mosby/Fomepizole/Fomepizole">https://www.pharmapendium.com/browse/mosby/Fomepizole/Fomepizole</a>                                                                                                                             |
| Trimethoprim | Trimethoprim. Mosby's Drug Consult. (2006). <a href="https://www.pharmapendium.com/#/browse/mosby/Trimethoprim/Trimethoprim">https://www.pharmapendium.com/#/browse/mosby/Trimethoprim/Trimethoprim</a>                                                                                                                                                                                     | <i>Br J Clin Pharmacol</i> <b>47</b> , 255-259 (1999)                                                                                                                                                                                                                                                                 |
| Oxazepam     | Oxazepam. Mosby's Drug Consult. (2006). <a href="https://www.pharmapendium.com/#/browse/mosby/Oxazepam/Oxazepam">https://www.pharmapendium.com/#/browse/mosby/Oxazepam/Oxazepam</a>                                                                                                                                                                                                         | Oxazepam. Mosby's Drug Consult. (2006). <a href="https://www.pharmapendium.com/#/browse/mosby/Oxazepam/Oxazepam">https://www.pharmapendium.com/#/browse/mosby/Oxazepam/Oxazepam</a>                                                                                                                                   |
| Ritonavir    | Ritonavir. Mosby's Drug Consult. (2006). <a href="https://www.pharmapendium.com/#/browse/mosby/Ritonavir/Ritonavir">https://www.pharmapendium.com/#/browse/mosby/Ritonavir/Ritonavir</a>                                                                                                                                                                                                    | Ritonavir. Mosby's Drug Consult. (2006). <a href="https://www.pharmapendium.com/#/browse/mosby/Ritonavir/Ritonavir">https://www.pharmapendium.com/#/browse/mosby/Ritonavir/Ritonavir</a>                                                                                                                              |

2/20/2020

[/browse/mosby/Ritonavir/Ritonavir](#)

Finasteride

Finasteride. FDA Approval Package. Medical/Clinical Review 020788/S-000 Part 03 (1997-12-19). Retrieved from <https://www.pharmapendium.com/#/browse/fda/Finasteride/fa76d8e4fb4829402ed41ad44706e0d5?query=nau&includeSynonyms=true>

Finasteride. Mosby's Drug Consult. (2006). <https://www.pharmapendium.com/#/browse/mosby/Finasteride/Finasteride#Brand%20Name:Propecia>
